# Supplementary material for: Assessing genomic diversity and signatures of selection in Pinan cattle using whole-genome sequencing data
Source: PubMed Central journal article supplement (PMC9215082; doi:10.1186/s12864-022-08645-y), 2022-06-21
Supplement: 12864_2022_8645_MOESM1_ESM.pdf [file 12864_2022_8645_MOESM1_ESM.pdf]

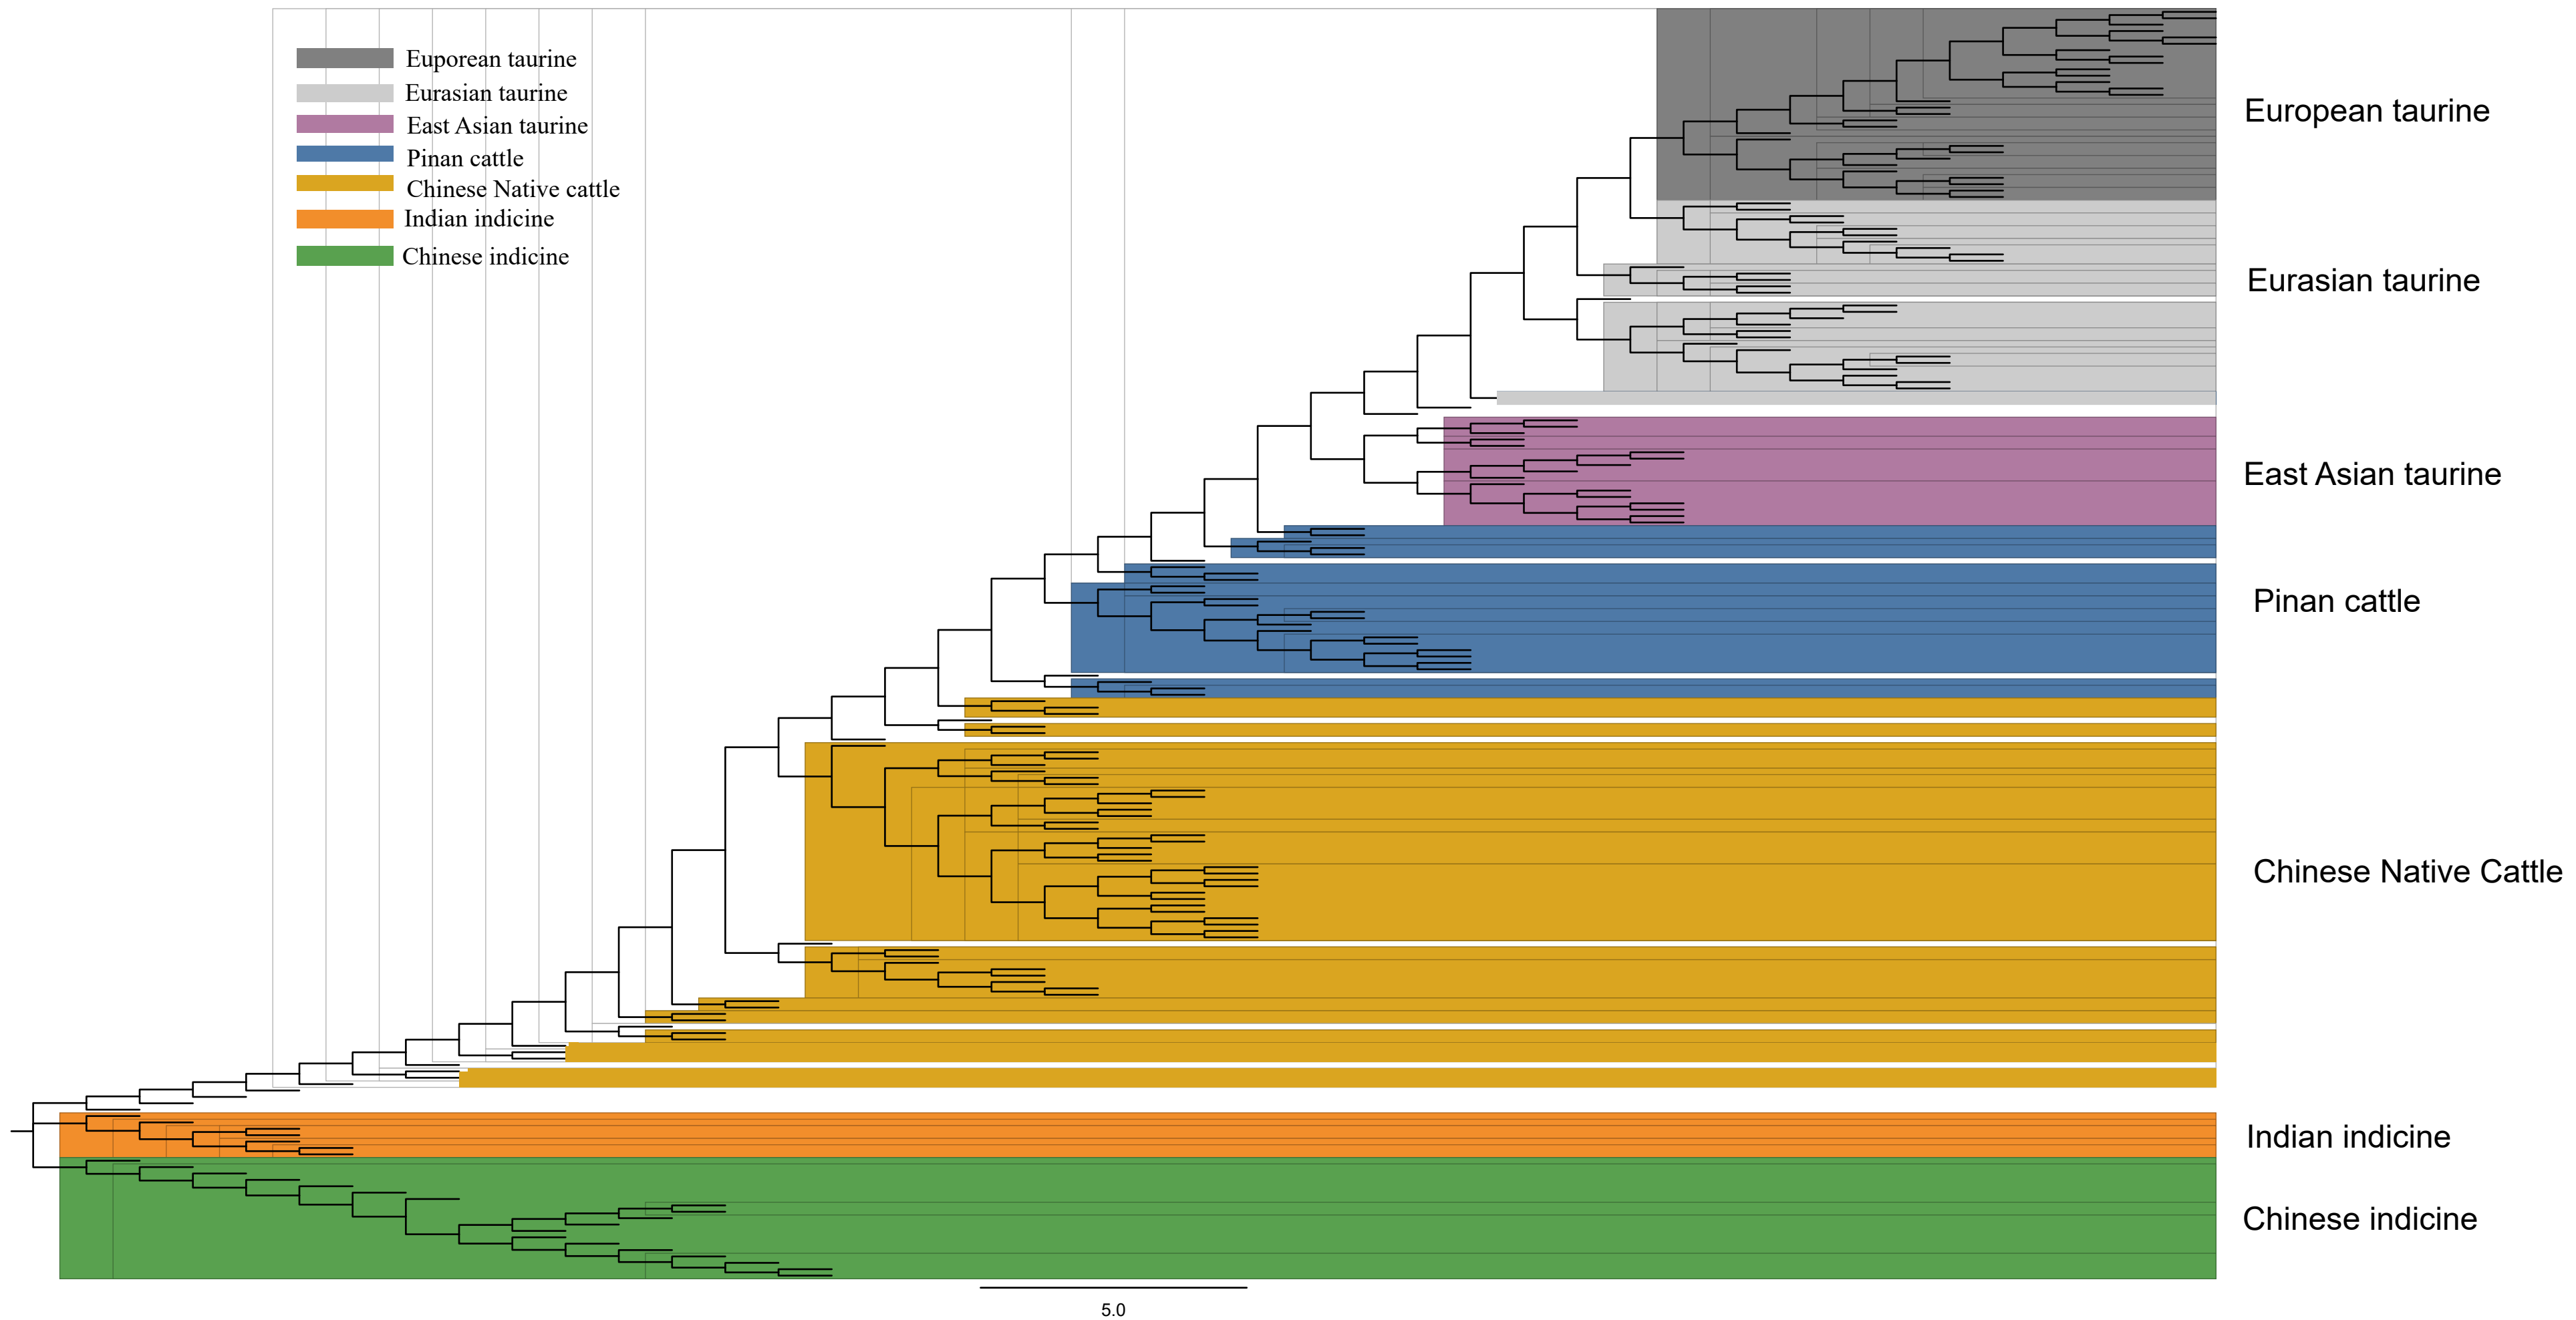

Figure S1. Phylogenetic tree constructed by neighbor-joining method from Pinan cattle and some other breeds.
